# Supplementary material for: Tracking semantic relatedness: numeral classifiers guide gaze to visual world objects
Source: Frontiers journal article supplement (doi:10.3389/flang.2023.1222982), 2023-09-06
Supplement: Data_Sheet_1.docx [file Data_Sheet_1.docx]

**Supplementary material**

**Nouns used in combination with the Sortal, Container and Default classifiers**

Sortal nouns:

帽子 màozi “hat”

花 huā “flower”

香蕉 xiāngjiāo “banana”

衬衫 jiàn “shirt”

镜子 jìngzi “mirror”

纸 zhǐ “paper”

笔 bǐ pen/pencil

信 xìn “letter”

书 shū “book”

刀 dāo “knife”

Container nouns:

饼干 bǐnggān “biscuit”

牙膏 yágāo “toothpaste”

茶 chá “tea”

咖啡 kāfēi “coffee”

果酱 guǒjiàng “jam”

啤酒 píjiǔ “beer”

水 shuǐ “water”

火柴 huǒchái “matches”

桔子 júzi “orange”

蜜 mì “honey”

Default nouns:

杯子 bēizi “glass”

瓶子 píngzi “bottle”

水壶 shuǐhú “teapot” - with no teabag to distinguish it from the “pot of tea”

洋娃娃 yángwáwa “doll”

本子 běnzi “notebook”

灯泡 dēngpào “lightbulb”

盘子 pánzi “plate”

盒子 hézi “metal box”

[照相机](https://www.mdbg.net/chinese/dictionary?page=worddict&wdrst=0&wdqb=camera)zhàoxiàngjī “camera”

皮包 píbāo “wallet”

**Double articulation**

10.8% of the recorded stimuli sentences had phonological double articulaton in the transition from classifier to noun. For example, during the pronunciation of the classifier there could be a pre-rounding of lips in unrounded vowels in anticipation of a [w] or [m] in the noun. Another case was when a classifier ended in a vowel and the voicing of this vowel influenced a normally voiceless affricate [t͡ʃ] in the noun; in this case, we let this voicing belong to the noun time window since initiating the fricative could give away which noun was in question. Finally, the –è of the very short default classifier always anticipated full stop plosives, and we cut them short before the closure of the plosive sound in the noun started, although the nouns then got some interference from the –è in the classifier. However, in cases of gliding pronunciation from [e] in classifier to [j] (voiced glide) in the noun and a j-sound was discernible in the classifier, we still kept the double articulation in the classifier time frame lest it add an extra syllable to the noun. Also, in cases where the classifier ended phonetically in the same phone as the nouns started with, [i] and [j], we chose maximum time for the classifier while the j- could still be heard from the same time point in the noun.

**Template sentences used as stimuli**

2. HAT, CL顶 dǐng

2A) 桌子上摆着一顶帽子。

zhuōzi shang bǎizhe yì dǐng màozi

table on place a class hat

“**There is (lies/stands) a hat on the table.**”

2B) 有人说桌上那顶帽子不好看.

yǒu rén shuō zhuō shang nà dǐng màozi bù hǎokàn.

exist person say table on that class hat not pretty

“**Someone said the hat on the table wasn’t pretty**.”

2C) 我不知道是谁把那顶帽子放在桌子上。

wǒ bù zhīdao shì shéi bǎ nà dǐng màozi fàng zài zhuōzi shang

I not know be who disp that class hat put on table on

“**I don’t know who put the hat on the table**.”

2D) 我觉得桌上的那顶帽子看起来不错。

wǒ juéde zhuō shang de nà dǐng màozi kàn qǐlái bú-cuò

I think table on sub that class hat look suff not-bad

**“I think the hat on the table looks quite fine.**”

3. FLOWER, CL朵 duǒ

3A) 桌子上摆着一朵花。

zhuōzi shang bǎizhe yì duǒ huā

table on place a class flower

“**There is (lies/stands) a flower on the table.**”

3B) 有人说桌上那朵花不好看.

yǒu rén shuō zhuō shang nà duǒ huā bù hǎokàn.

exist person say table on that class flower not pretty

“**Someone said the flower on the table wasn’t pretty**.”

3C) 我不知道是谁把那朵花放在桌子上。

wǒ bù zhīdao shì shéi bǎ nà duǒ huā fàng zài zhuōzi shang

I not know be who disp that class flower put on table on

“**I don’t know who put the flower on the table**.”

3D) 我觉得桌上的那朵花看起来不错。

wǒ juéde zhuō shang de nà duǒ huā kàn qǐlái bú-cuò

I think table on sub that class flower look suff not-bad

**“I think the apple on the flower looks quite fine.**”

4. BANANA, CL 根 gēn

4A) 桌子上摆着一根香蕉。

zhuōzi shang bǎizhe yì gēn xiāngjiāo

table on place a class banana

“**There is (lies/stands) a banana on the table.**”

4B) 有人说桌上那根香蕉不好看.

yǒu rén shuō zhuō shang nà gēn xiāngjiāo bù hǎokàn.

exist person say table on that class banana not pretty

“**Someone said the banana on the table wasn’t pretty**.”

4C) 我不知道是谁把那根香蕉放在桌子上。

wǒ bù zhīdao shì shéi bǎ nà gēn xiāngjiāo fàng zài zhuōzi shang

I not know be who disp that class banana put on table on

“**I don’t know who put the banana on the table**.”

4D) 我觉得桌上的那根香蕉看起来不错。

wǒ juéde zhuō shang de nà gēn xiāngjiāo kàn qǐlái bú-cuò

I think table on sub that class banana look suff not-bad

**“I think the banana on the table looks quite fine.**”

5. SHIRT, CL 件 jiàn

5A) 桌子上摆着一件衬衫。

zhuōzi shang bǎizhe yí jiàn chènshān

table on place a class shirt

“**There is (lies/stands) a shirt on the table.**”

5B) 有人说桌上那件衬衫不好看.

yǒu rén shuō zhuō shang nà jiàn chènshān bù hǎokàn.

exist person say table on that class shirt not pretty

“**Someone said the shirt on the table wasn’t pretty**.”

5C) 我不知道是谁把那件衬衫放在桌子上。

wǒ bù zhīdao shì shéi bǎ nà jiàn chènshān fàng zài zhuōzi shang

I not know be who disp that class shirt put on table on

“**I don’t know who put the shirt on the table**.”

5D) 我觉得桌上的那件衬衫看起来不错。

wǒ juéde zhuō shang de nà jiàn chènshān kàn qǐlái bú-cuò

I think table on sub that class shirt look suff not-bad

**“I think the shirt on the table looks quite fine.**”

6. MIRROR; CL面 miàn

6A) 桌子上摆着一面镜子。

zhuōzi shang bǎizhe yì miàn jìngzi

table on place a class mirror

“**There is (lies/stands) a mirror on the table.**”

6B) 有人说桌上那面镜子不好看.

yǒu rén shuō zhuō shang nà miàn jìngzi bù hǎokàn.

exist person say table on that class mirror not pretty

“**Someone said the mirror on the table wasn’t pretty**.”

6C) 我不知道是谁把那面镜子放在桌子上。

wǒ bù zhīdao shì shéi bǎ nà miàn jìngzi fàng zài zhuōzi shang

I not know be who disp that class mirror put on table on

“**I don’t know who put the mirror on the table**.”

6D) 我觉得桌上的那面镜子看起来不错。

wǒ juéde zhuō shang de nà miàn jìngzi kàn qǐlái bú-cuò

I think table on sub that class mirror look suff not-bad

**“I think the mirror on the table looks quite fine.**”

7. PAPER; CL张 zhāng

7A) 桌子上摆着一张纸。

zhuōzi shang bǎizhe yì zhāng zhǐ

table on place a class paper

“**There is (lies/stands) a paper on the table.**”

7B) 有人说桌上那张纸不好看.

yǒu rén shuō zhuō shang nà zhāng zhǐ bù hǎokàn.

exist person say table on that class paper not pretty

“**Someone said the paper on the table wasn’t pretty**.”

7C) 我不知道是谁把那张纸放在桌子上。

wǒ bù zhīdao shì shéi bǎ nà zhāng zhǐ fàng zài zhuōzi shang

I not know be who disp that class paper put on table on

“**I don’t know who put the paper on the table**.”

7D) 我觉得桌上的那张纸看起来不错。

wǒ juéde zhuō shang de nà zhāng zhǐ kàn qǐlái bú-cuò

I think table on sub that class paper look suff not-bad

**“I think the paper on the table looks quite fine.**”

8. PEN(CIL); CL支 zhī

8A) 桌子上摆着一支笔。

zhuōzi shang bǎizhe yì zhī bǐ

table on place a class pen(cil)

“**There is (lies/stands) a pen(cil) on the table.**”

8B) 有人说桌上那支笔不好看.

yǒu rén shuō zhuō shang nà zhī bǐ bù hǎokàn.

exist person say table on that class pen(cil) not pretty

“**Someone said the pen(cil) on the table wasn’t pretty**.”

8C) 我不知道是谁把那支笔放在桌子上。

wǒ bù zhīdao shì shéi bǎ nà zhī bǐ fàng zài zhuōzi shang

I not know be who disp that class pen(cil) put on table on

“**I don’t know who put the pen(cil) on the table**.”

8D) 我觉得桌上的那支笔看起来不错。

wǒ juéde zhuō shang de nà zhī bǐ kàn qǐlái bú-cuò

I think table on sub that class pen(cil) look suff not-bad

**“I think the pen(cil) on the table looks quite fine.**”

9. LETTER; CL 封 fēng

9A) 桌子上摆着一封信。

zhuōzi shang bǎizhe yì fēng xìn

table on place a class letter

“**There is (lies/stands) a letter on the table.**”

9B) 有人说桌上那封信不好看.

yǒu rén shuō zhuō shang nà fēng xìn bù hǎokàn.

exist person say table on that class letter not pretty

“**Someone said the letter on the table wasn’t pretty**.”

9C) 我不知道是谁把那封信放在桌子上。

wǒ bù zhīdao shì shéi bǎ nà fēng xìn fàng zài zhuōzi shang

I not know be who disp that class letter put on table on

“**I don’t know who put the letter on the table**.”

9D) 我觉得桌上的那封信看起来不错。

wǒ juéde zhuō shang de nà fēng xìn kàn qǐlái bú-cuò

I think table on sub that class letter look suff not-bad

**“I think the letter on the table looks quite fine.**”

10. BOOK; CL本 běn

10A) 桌子上摆着一本书。

zhuōzi shang bǎizhe yì běn shū

table on place a class book

“**There is (lies/stands) a book on the table.**”

10B) 有人说桌上那本书不好看.

yǒu rén shuō zhuō shang nà běn shū bù hǎokàn.

exist person say table on that class book not pretty

“**Someone said the book on the table wasn’t pretty**.”

10C) 我不知道是谁把那本书放在桌子上。

wǒ bù zhīdao shì shéi bǎ nà běn shū fàng zài zhuōzi shang

I not know be who disp that class book put on table on

“**I don’t know who put the book on the table**.”

10D) 我觉得桌上的那本书看起来不错。

wǒ juéde zhuō shang de nà běn shū kàn qǐlái bú-cuò

I think table on sub that class book look suff not-bad

**“I think the book on the table looks quite fine.**”

11. KNIFE; CL把 bǎ

11A) 桌子上摆着一把刀。

zhuōzi shang bǎizhe yì bǎ dāo

table on place a class knife

“**There is (lies/stands) a knife on the table.**”

11B) 有人说桌上那把刀不好看.

yǒu rén shuō zhuō shang nà bǎ dāo bù hǎokàn.

exist person say table on that class knife not pretty

“**Someone said the knife on the table wasn’t pretty**.”

11C) 我不知道是谁把那把刀放在桌子上。

wǒ bù zhīdao shì shéi bǎ nà bǎ dāo fàng zài zhuōzi shang

I not know be who disp that class knife put on table on

“**I don’t know who put the knife on the table**.”

11D) 我觉得桌上的那把刀看起来不错。

wǒ juéde zhuō shang de nà bǎ dāo kàn qǐlái bú-cuò

I think table on sub that class knife look suff not-bad

**“I think the knife on the table looks quite fine.**”

12. PACK OF BISCUITS, CL 包 bāo

12A) 桌子上摆着一包饼干。

zhuōzi shang bǎizhe yì bāo bǐnggān

table on place a class biscuit

“**There is (lies/stands) a pack of biscuits on the table.**”

12B) 有人说桌上那包饼干不好看.

yǒu rén shuō zhuō shang nà bāo bǐnggān bù hǎokàn.

exist person say table on that class biscuit not pretty

“**Someone said the pack of biscuits on the table wasn’t pretty**.”

12C) 我不知道是谁把那包饼干放在桌子上。

wǒ bù zhīdao shì shéi bǎ nà bāo bǐnggān fàng zài zhuōzi shang

I not know be who disp that class biscuit put on table on

“**I don’t know who put the pack of biscuits on the table**.”

12D) 我觉得桌上的那包饼干看起来不错。

wǒ juéde zhuō shang de nà bāo bǐnggān kàn qǐlái bú-cuò

I think table on sub that class biscuit look suff not-bad

**“I think the pack of biscuits on the table looks quite fine.**”

13. TUBE OF TOOTHPASTE; CL支 zhī

13A) 桌子上摆着一支牙膏。

zhuōzi shang bǎizhe yì zhī yágāo

table on place a class toothpaste

“**There is (lies/stands) a tube of toothpaste on the table.**”

13B) 有人说桌上那支牙膏不好看.

yǒu rén shuō zhuō shang nà zhī yágāo bù hǎokàn.

exist person say table on that class toothpaste not pretty

“**Someone said the toothpaste on the table wasn’t pretty**.”

13C) 我不知道是谁把那支牙膏放在桌子上。

wǒ bù zhīdao shì shéi bǎ nà zhī yágāo fàng zài zhuōzi shang

I not know be who disp that class toothpaste put on table on

“**I don’t know who put the toothpaste on the table**.”

13D) 我觉得桌上的那支牙膏看起来不错。

wǒ juéde zhuō shang de nà kē yágāo kàn qǐlái bú-cuò

I think table on sub that class toothpaste look suff not-bad

**“I think the toothpaste on the table looks quite fine.**”

14. POT OF TEA; CL壶 hú

14A) 桌子上摆着一壶茶。

zhuōzi shang bǎizhe yì hú chá

table on place a class tea

“**There is (lies/stands) a pot of tea on the table.**”

14B) 有人说桌上那壶茶不好看.

yǒu rén shuō zhuō shang nà hú chá bù hǎokàn.

exist person say table on that class tea not pretty

“**Someone said the pot of tea on the table wasn’t pretty**.”

14C) 我不知道是谁把那壶茶放在桌子上。

wǒ bù zhīdao shì shéi bǎ nà hú chá fàng zài zhuōzi shang

I not know be who disp that class tea put on table on

“**I don’t know who put the pot of tea on the table**.”

14D) 我觉得桌上的那壶茶看起来不错。

wǒ juéde zhuō shang de nà hú chá kàn qǐlái bú-cuò

I think table on sub that class tea look suff not-bad

**“I think the pot of tea on the table looks quite fine.**”

15. CUP OF COFFEE; CL 杯 bēi

15A) 桌子上摆着一杯咖啡。

zhuōzi shang bǎizhe yì bēi kāfēi

table on place a class coffee

“**There is (lies/stands) a cup of coffee on the table.**”

15B) 有人说桌上那杯咖啡不好看.

yǒu rén shuō zhuō shang nà bēi kāfēi bù hǎokàn.

exist person say table on that class coffee not pretty

“**Someone said the cup of coffee on the table wasn’t pretty**.”

15C) 我不知道是谁把那杯咖啡放在桌子上。

wǒ bù zhīdao shì shéi bǎ nà bēi kāfēi fàng zài zhuōzi shang

I not know be who disp that class coffee put on table on

“**I don’t know who put the cup of coffee on the table**.”

15D) 我觉得桌上的那杯咖啡看起来不错。

wǒ juéde zhuō shang de nà bēi kāfēi kàn qǐlái bú-cuò

I think table on sub that class coffee look suff not-bad

**“I think the cup of coffee on the table looks quite fine.**”

16. JAR OF JAM; CL 罐 guàn

16A) 桌子上摆着一罐果酱。

zhuōzi shang bǎizhe yì guàn guǒjiàng

table on place a class jam

“**There is (lies/stands) a jar of jam on the table.**”

16B) 有人说桌上那罐果酱不好看.

yǒu rén shuō zhuō shang nà guàn guǒjiàng bù hǎokàn.

exist person say table on that class jam not pretty

“**Someone said the jar of jam on the table wasn’t pretty**.”

16C) 我不知道是谁把那罐果酱放在桌子上。

wǒ bù zhīdao shì shéi bǎ nà guàn guǒjiàng fàng zài zhuōzi shang

I not know be who disp that class jam put on table on

“**I don’t know who put the jar of jam on the table**.”

16D) 我觉得桌上的那罐果酱看起来不错。

wǒ juéde zhuō shang de nà guàn guǒjiàng kàn qǐlái bú-cuò

I think table on sub that class jam look suff not-bad

**“I think the jar of jam on the table looks quite fine.**”

17. CAN OF BEER; CL听 ting

17A) 桌子上摆着一听啤酒。

zhuōzi shang bǎizhe yì tīng píjiǔ

table on place a class beer

“**There is (lies/stands) a can of beer on the table.**”

17B) 有人说桌上那听啤酒不好看.

yǒu rén shuō zhuō shang nà tīng píjiǔ bù hǎokàn.

exist person say table on that class beer not pretty

“**Someone said the can of beer on the table wasn’t pretty**.”

17C) 我不知道是谁把那听啤酒放在桌子上。

wǒ bù zhīdao shì shéi bǎ nà tīng píjiǔ fàng zài zhuōzi shang

I not know be who disp that class beer put on table on

“**I don’t know who put the can of beer on the table**.”

17D) 我觉得桌上的那听啤酒看起来不错。

wǒ juéde zhuō shang de nà tīng píjiǔ kàn qǐlái bú-cuò

I think table on sub that class beer look suff not-bad

**“I think the can of beer on the table looks quite fine.**”

18. BOTTLE OF WATER; CL瓶 píng

18A) 桌子上摆着一瓶水。

zhuōzi shang bǎizhe yì píng shuǐ

table on place a class water

“**There is (lies/stands) a bottle of water on the table.**”

18B) 有人说桌上那瓶水不好看.

yǒu rén shuō zhuō shang nà píng shuǐ bù hǎokàn.

exist person say table on that class water not pretty

“**Someone said the bottle of water on the table wasn’t pretty**.”

18C) 我不知道是谁把那瓶水放在桌子上。

wǒ bù zhīdao shì shéi bǎ nà píng shuǐ fàng zài zhuōzi shang

I not know be who disp that class water put on table on

“**I don’t know who put the bottle of water on the table**.”

18D) 我觉得桌上的那瓶水看起来不错。

wǒ juéde zhuō shang de nà píng shuǐ kàn qǐlái bú-cuò

I think table on sub that class water look suff not-bad

**“I think the bottle of water on the table looks quite fine.**”

19. BOX OF MATCHES; CL盒 hé

19A) 桌子上摆着一盒火柴。

zhuōzi shang bǎizhe yì hé huǒchái

table on place a class matches

“**There is (lies/stands) a box of matches on the table.**”

19B) 有人说桌上那盒火柴不好看.

yǒu rén shuō zhuō shang nà hé huǒchái bù hǎokàn.

exist person say table on that class matches not pretty

“**Someone said the box of matches on the table wasn’t pretty**.”

19C) 我不知道是谁把那盒火柴放在桌子上。

wǒ bù zhīdao shì shéi bǎ nà hé huǒchái fàng zài zhuōzi shang

I not know be who disp that class matches put on table on

“**I don’t know who put the box of matches on the table**.”

19D) 我觉得桌上的那盒火柴看起来不错。

wǒ juéde zhuō shang de nà hé huǒchái kàn qǐlái bú-cuò

I think table on sub that class matches look suff not-bad

**“I think the box of matches on the table looks quite fine.**”

20. BASKET OF ORANGES; CL篮 lán

20A) 桌子上摆着一篮桔子。

zhuōzi shang bǎizhe yì lán júzi

table on place a class oranges

“**There is (lies/stands) a basket of oranges on the table.**”

20B) 有人说桌上那篮桔子不好看.

yǒu rén shuō zhuō shang nà lán júzi bù hǎokàn.

exist person say table on that class oranges not pretty

“**Someone said the basket of oranges on the table wasn’t pretty**.”

20C) 我不知道是谁把那篮桔子放在桌子上。

wǒ bù zhīdao shì shéi bǎ nà lán júzi fàng zài zhuōzi shang

I not know be who disp that class oranges put on table on

“**I don’t know who put the basket of oranges on the table**.”

20D) 我觉得桌上的那篮桔子看起来不错。

wǒ juéde zhuō shang de nà lán júzi kàn qǐlái bú-cuò

I think table on sub that class oranges look suff not-bad

**“I think the basket of oranges on the table looks quite fine.**”

21. SPOONFUL OF HONEY; CL勺 sháo

21A) 桌子上摆着一勺蜜。

zhuōzi shang bǎizhe yì sháo mì

table on place a class honey

“**There is (lies/stands) a spoonful of honey on the table.**”

21B) 有人说桌上那勺蜜不好看.

yǒu rén shuō zhuō shang nà sháo mì bù hǎokàn.

exist person say table on that class honey not pretty

“**Someone said the spoonful of honey on the table wasn’t pretty**.”

21C) 我不知道是谁把那勺蜜放在桌子上。

wǒ bù zhīdao shì shéi bǎ nà sháo mì fàng zài zhuōzi shang

I not know be who disp that class honey put on table on

“**I don’t know who put the spoonful of honey on the table**.”

21D) 我觉得桌上的那勺蜜看起来不错。

wǒ juéde zhuō shang de nà sháo mì kàn qǐlái bú-cuò

I think table on sub that class honey look suff not-bad

**“I think the spoonful of honey on the table looks quite fine.**”

22. CUP/GLASS; CL个 gè (default)

22A) 桌子上摆着一个杯子。

zhuōzi shang bǎizhe yì gè bēizi

table on place a class cup/glass

“**There is (lies/stands) a cup/glass on the table.**”

22B) 有人说桌上那个杯子不好看.

yǒu rén shuō zhuō shang nà gè bēizi bù hǎokàn.

exist person say table on that class apple not pretty

“**Someone said the cup/glass on the table wasn’t pretty**.”

22C) 我不知道是谁把那个杯子放在桌子上。

wǒ bù zhīdao shì shéi bǎ nà gè bēizi fàng zài zhuōzi shang

I not know be who disp that class cup/glass put on table on

“**I don’t know who put the cup/glass on the table**.”

22D) 我觉得桌上的那个杯子看起来不错。

wǒ juéde zhuō shang de nà gè bēizi kàn qǐlái bú-cuò

I think table on sub that class cup/glass look suff not-bad

**“I think the cup/glass on the table looks quite fine.**”

23. BOTTLE; CL个 gè (default)

23A) 桌子上摆着一个瓶子。

zhuōzi shang bǎizhe yì gè píngzi

table on place a class bottle

“**There is (lies/stands) a bottle on the table.**”

23B) 有人说桌上那个瓶子不好看.

yǒu rén shuō zhuō shang nà gè píngzi bù hǎokàn.

exist person say table on that class bottle not pretty

“**Someone said the bottle on the table wasn’t pretty**.”

23C) 我不知道是谁把那个瓶子放在桌子上。

wǒ bù zhīdao shì shéi bǎ nà gè píngzi fàng zài zhuōzi shang

I not know be who disp that class bottle put on table on

“**I don’t know who put the bottle on the table**.”

23D) 我觉得桌上的那个瓶子看起来不错。

wǒ juéde zhuō shang de nà gè píngzi kàn qǐlái bú-cuò

I think table on sub that class bottle look suff not-bad

**“I think the bottle on the table looks quite fine.**”

24. POT/KETTLE; CL个 gè (default)

24A) 桌子上摆着一个水壶。

zhuōzi shang bǎizhe yì gè shuǐhú

table on place a class pot/kettle

“**There is (lies/stands) a pot/kettle on the table.**”

24B) 有人说桌上那个水壶不好看.

yǒu rén shuō zhuō shang nà gè shuǐhú bù hǎokàn.

exist person say table on that class pot/kettle not pretty

“**Someone said the pot/kettle on the table wasn’t pretty**.”

24C) 我不知道是谁把那个水壶放在桌子上。

wǒ bù zhīdao shì shéi bǎ nà gè shuǐhú fàng zài zhuōzi shang

I not know be who disp that class pot/kettle put on table on

“**I don’t know who put the pot/kettle on the table**.”

24D) 我觉得桌上的那个水壶看起来不错。

wǒ juéde zhuō shang de nà gè shuǐhú kàn qǐlái bú-cuò

I think table on sub that class pot/kettle look suff not-bad

**“I think the pot/kettle on the table looks quite fine.**”

25. DOLL; CL个 gè (default)

25A) 桌子上摆着一个洋娃娃。

zhuōzi shang bǎizhe yì gè yángwáwa

table on place a class doll

“**There is (lies/stands) a doll on the table.**”

25B) 有人说桌上那个洋娃娃不好看.

yǒu rén shuō zhuō shang nà gè yángwáwa bù hǎokàn.

exist person say table on that class doll not pretty

“**Someone said the doll on the table wasn’t pretty**.”

25C) 我不知道是谁把那个洋娃娃放在桌子上。

wǒ bù zhīdao shì shéi bǎ nà gè yángwáwa fàng zài zhuōzi shang

I not know be who disp that class doll put on table on

“**I don’t know who put the doll on the table**.”

25D) 我觉得桌上的那个洋娃娃看起来不错。

wǒ juéde zhuō shang de nà gè yángwáwa kàn qǐlái bú-cuò

I think table on sub that class doll look suff not-bad

**“I think the doll on the table looks quite fine.**”

26. BOWL; CL个 gè (default)

26A) 桌子上摆着一个碗。

zhuōzi shang bǎizhe yì gè wǎn

table on place a class bowl

“**There is (lies/stands) a bowl on the table.**”

26B) 有人说桌上那个碗不好看.

yǒu rén shuō zhuō shang nà gè wǎn bù hǎokàn.

exist person say table on that class bowl not pretty

“**Someone said the bowl on the table wasn’t pretty**.”

26C) 我不知道是谁把那个碗放在桌子上。

wǒ bù zhīdao shì shéi bǎ nà gè wǎn fàng zài zhuōzi shang

I not know be who disp that class bowl put on table on

“**I don’t know who put the bowl on the table**.”

26D) 我觉得桌上的那个苹果看起来不错。

wǒ juéde zhuō shang de nà gè wǎn kàn qǐlái bú-cuò

I think table on sub that class bowl look suff not-bad

**“I think the bowl on the table looks quite fine.**”

27. NOTEBOOK; CL个 gè (default)

27A) 桌子上摆着一个本子。

zhuōzi shang bǎizhe yì gè běnzi

table on place a class notebook

“**There is (lies/stands) a notebook on the table.**”

27B) 有人说桌上那个本子不好看.

yǒu rén shuō zhuō shang nà gè běnzi bù hǎokàn.

exist person say table on that class notebook not pretty

“**Someone said the notebook on the table wasn’t pretty**.”

27C) 我不知道是谁把那个本子放在桌子上。

wǒ bù zhīdao shì shéi bǎ nà gè běnzi fàng zài zhuōzi shang

I not know be who disp that class notebook put on table on

“**I don’t know who put the notebook on the table**.”

27D) 我觉得桌上的那个本子看起来不错。

wǒ juéde zhuō shang de nà gè běnzi kàn qǐlái bú-cuò

I think table on sub that class notebook look suff not-bad

**“I think the notebook on the table looks quite fine.**”

28. LIGHTBULB; CL个 gè (default)

28A) 桌子上摆着一个灯泡。

zhuōzi shang bǎizhe yì gè dēngpào

table on place a class lightbulb

“**There is (lies/stands) a lightbulb on the table.**”

28B) 有人说桌上那个灯泡不好看.

yǒu rén shuō zhuō shang nà gè dēngpào bù hǎokàn.

exist person say table on that class lightbulb not pretty

“**Someone said the lightbulb on the table wasn’t pretty**.”

28C) 我不知道是谁把那个灯泡放在桌子上。

wǒ bù zhīdao shì shéi bǎ nà gè dēngpào fàng zài zhuōzi shang

I not know be who disp that class lightbulb put on table on

“**I don’t know who put the lightbulb on the table**.”

28D) 我觉得桌上的那个灯泡看起来不错。

wǒ juéde zhuō shang de nà gè dēngpào kàn qǐlái bú-cuò

I think table on sub that class lightbulb look suff not-bad

**“I think the lightbulb on the table looks quite fine.**”

29. PLATE; CL个 gè (default)

29A) 桌子上摆着一个盘子。

zhuōzi shang bǎizhe yì gè pánzi

table on place a class plate

“**There is (lies/stands) a plate on the table.**”

29B) 有人说桌上那个盘子不好看.

yǒu rén shuō zhuō shang nà gè pánzi bù hǎokàn.

exist person say table on that class plate not pretty

“**Someone said the plate on the table wasn’t pretty**.”

29C) 我不知道是谁把那个盘子放在桌子上。

wǒ bù zhīdao shì shéi bǎ nà gè pánzi fàng zài zhuōzi shang

I not know be who disp that class plate put on table on

“**I don’t know who put the plate on the table**.”

29D) 我觉得桌上的那个盘子看起来不错。

wǒ juéde zhuō shang de nà gè pánzi kàn qǐlái bú-cuò

I think table on sub that class plate look suff not-bad

**“I think the plate on the table looks quite fine.**”

30. BOX; CL个 gè (default)

30A) 桌子上摆着一个盒子。

zhuōzi shang bǎizhe yì gè hézi

table on place a class box

“**There is (lies/stands) a box on the table.**”

30B) 有人说桌上那个盒子不好看.

yǒu rén shuō zhuō shang nà gè hézi bù hǎokàn.

exist person say table on that class box not pretty

“**Someone said the box on the table wasn’t pretty**.”

30C) 我不知道是谁把那个盒子放在桌子上。

wǒ bù zhīdao shì shéi bǎ nà gè hézi fàng zài zhuōzi shang

I not know be who disp that class box put on table on

“**I don’t know who put the box on the table**.”

30D) 我觉得桌上的那个盒子看起来不错。

wǒ juéde zhuō shang de nà gè hézi kàn qǐlái bú-cuò

I think table on sub that class box look suff not-bad

**“I think the box on the table looks quite fine.**”

31. WALLET; CL个 gè (default)

31A) 桌子上摆着一个皮包。

zhuōzi shang bǎizhe yì gè píbāo

table on place a class wallet

“**There is (lies/stands) a wallet on the table.**”

31B) 有人说桌上那个皮包不好看.

yǒu rén shuō zhuō shang nà gè píbāo bù hǎokàn.

exist person say table on that class wallet not pretty

“**Someone said the wallet on the table wasn’t pretty**.”

31C) 我不知道是谁把那个皮包放在桌子上。

wǒ bù zhīdao shì shéi bǎ nà gè píbāo fàng zài zhuōzi shang

I not know be who disp that class wallet put on table on

“**I don’t know who put the wallet on the table**.”

31D) 我觉得桌上的那个皮包看起来不错。

wǒ juéde zhuō shang de nà gè píbāo kàn qǐlái bú-cuò

I think table on sub that class wallet look suff not-bad

**“I think the wallet on the table looks quite fine.**”
